# Supplementary material
Source: PubMed Central journal article supplement (PMC6320505)
Supplement: pnas.1816656115.sapp.pdf [file pnas.1816656115.sapp.pdf]

# PNAS

www.pnas.org

## Supplementary information for:

MITO-Tag Mice enable rapid isolation and multimodal profiling of mitochondria  
from specific cell types *in vivo*

Erol C. Bayraktar<sup>1</sup>, Lou Baudrier<sup>1</sup>, Ceren Özerdem<sup>1</sup>, Caroline A. Lewis<sup>2</sup>, Sze Ham  
Chan<sup>2</sup>, Tenzin Kunchok<sup>2</sup>, Monther Abu-Remaileh<sup>2,3,4,5</sup>, Andrew L. Cangelosi<sup>2,3,4,5</sup>, David  
M. Sabatini<sup>2,3,4,5,7\*</sup>, Kivanc Birsoy<sup>1,7\*</sup>, and Walter W. Chen<sup>2,3,4,5,6,7\*</sup>

<sup>1</sup>Laboratory of Metabolic Regulation and Genetics, The Rockefeller University, New York  
City, NY 10065, USA

<sup>2</sup>Whitehead Institute for Biomedical Research and Massachusetts Institute of  
Technology, Department of Biology, 9 Cambridge Center, Cambridge, MA 02142, USA

<sup>3</sup>Howard Hughes Medical Institute, Department of Biology, Massachusetts Institute of  
Technology, Cambridge, MA 02139, USA

<sup>4</sup>Koch Institute for Integrative Cancer Research, 77 Massachusetts Avenue, Cambridge,  
MA 02139, USA

<sup>5</sup>Broad Institute of Harvard and Massachusetts Institute of Technology, 7 Cambridge  
Center, Cambridge, MA 02142, USA

<sup>6</sup>Present address: Boston Combined Residency Program, Department of Pediatrics,  
Boston Children's Hospital, 300 Longwood Avenue, Boston, MA 02115, USA

<sup>7</sup>These authors contributed equally to this work

\*Correspondence should be addressed to Walter W. Chen  
(walter.chen@childrens.harvard.edu), Kivanc Birsoy (kbirsoy@mail.rockefeller.edu), David  
M. Sabatini (sabatini@wi.mit.edu)

**This PDF file includes:**

Fig. S1

**Other supplementary materials for this manuscript include the following:**

Datasets S1 to S4

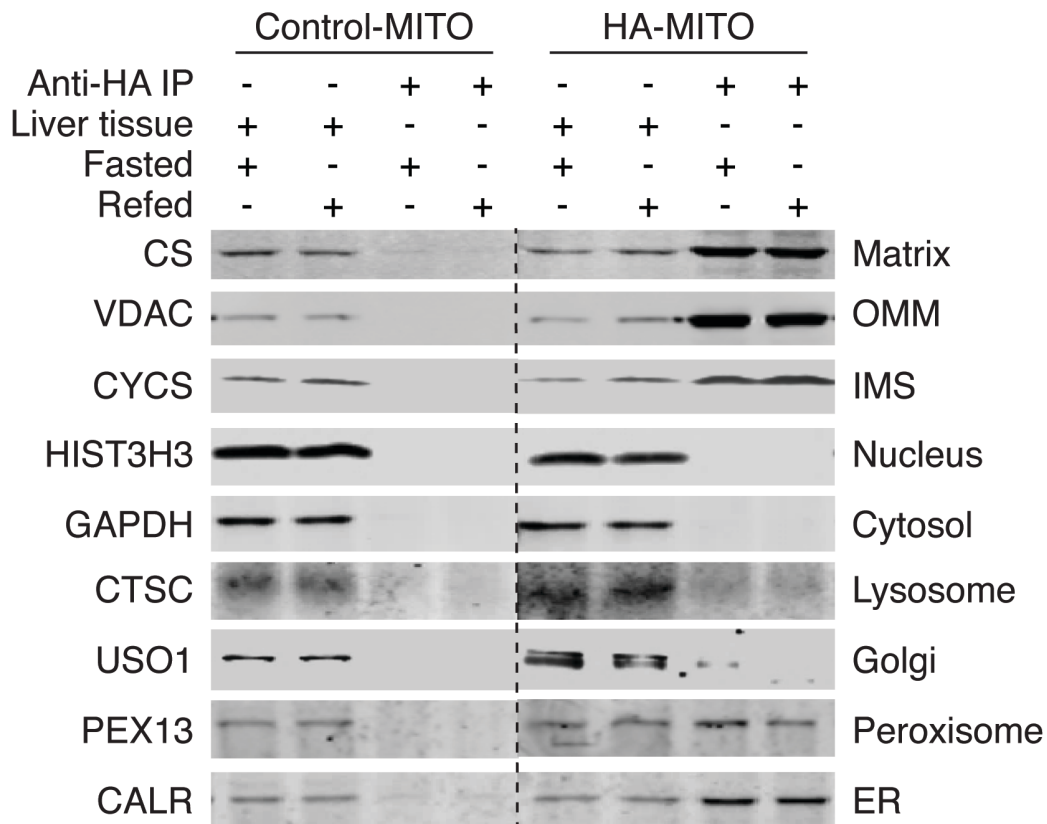

**Fig. S1. Characterization of IP purity for mitochondrial isolations performed on mice during fasted and refed conditions.** Immunoblot analysis of liver tissue and the anti-HA IPs from Control-MITO and HA-MITO mice. The names of the protein markers used and the corresponding subcellular compartments appear to the left and right of the immunoblots, respectively. The line indicates that two parts of the same membrane have been brought together. Matrix, mitochondrial matrix; OMM, outer mitochondrial membrane; IMS, mitochondrial intermembrane space; Golgi, Golgi complex; ER, endoplasmic reticulum; Control-MITO, Control-MITO mice; HA-MITO, HA-MITO mice.

**Additional Dataset S1 (separate file):**

Proteomic analysis of Control-MITO and HA-MITO IPs

**Additional Dataset S2 (separate file):**

Lipidomic analysis (fasted and refed conditions)

**Additional Dataset S3 (separate file):**

Polar metabolomic analysis (fasted and refed conditions)

**Additional Dataset S4 (separate file):**

Untargeted analysis with targeted follow-up analysis (fasted and refed conditions)
